# Supplementary material for: Bradycardia Associated with Steroid Use for Laryngeal Edema in an Adult: A Case Report and Literature Review
Source: Hindawi journal article supplement (doi:10.1155/2016/9785467), 2016-01-01

Male  
68In  
Room:  
Loc:2

Caucasian  
345lb

Vent. rate 48  
PR interval 184 ms  
QRS duration 110 ms  
QT/QTc 480/428 ms  
P-R-T axes 27 36 51

Marked sinus bradycardia  
Abnormal ECG  
When compared with ECG of 28-AUG-2015 22:01, (unconfirmed)  
No significant change was found

Technician:  
Test Ind:

Referred by:

Confirmed By: MICHAEL MILLER

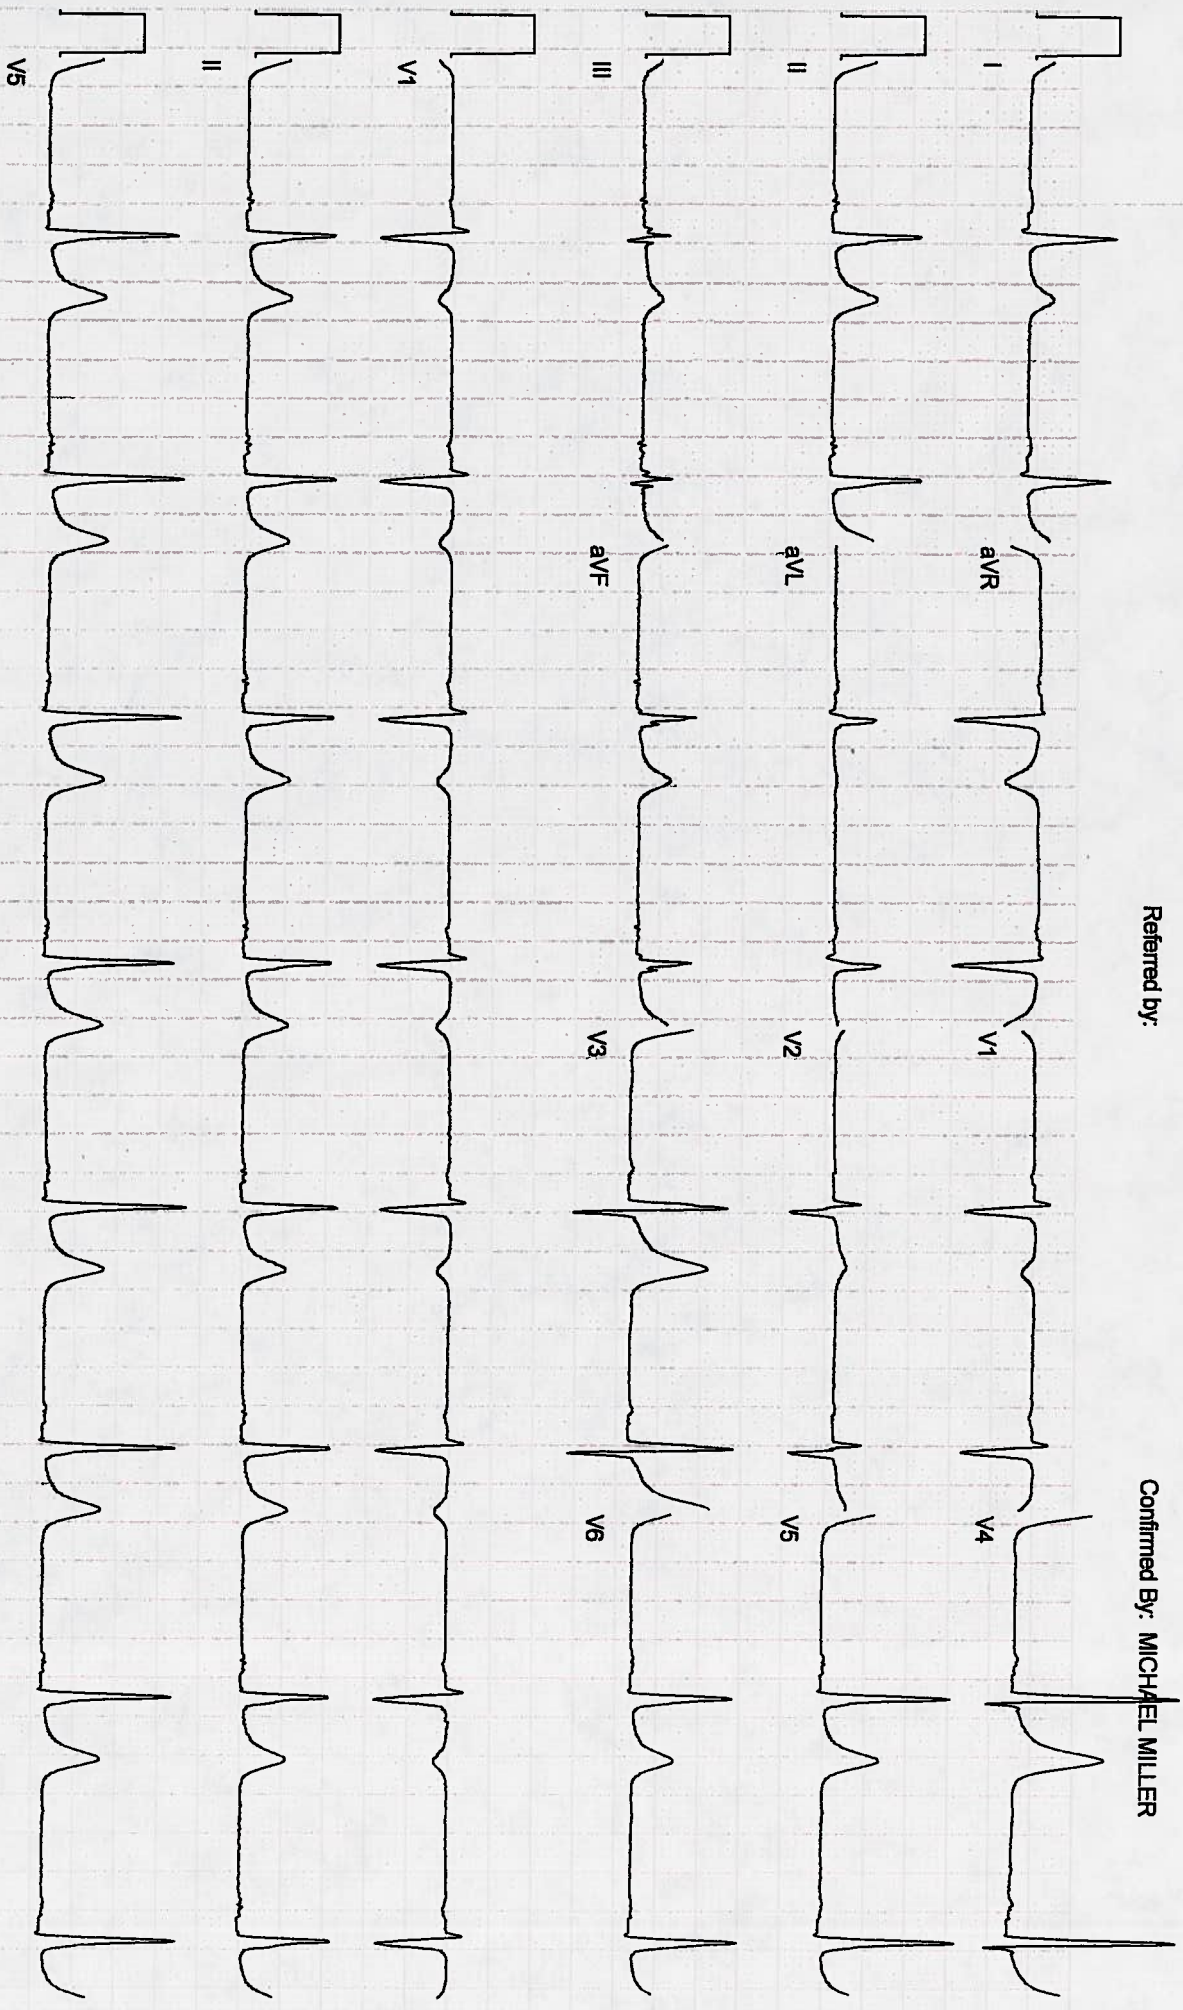

Male  
68in  
Room:  
Loc:2

Caucasian  
345lb  
Vent. rate  
PR interval  
QRS duration  
QT/QTc  
P-R-T axes

55  
160  
94  
478/457  
23 29  
37

BPM  
ms  
ms  
ms  
ms  
ms

Sinus bradycardia with frequent Premature ventricular complexes in a pattern of bigeminy  
Otherwise normal ECG  
When compared with ECG of 01-SEP-2015 10:40, (unconfirmed)  
Premature ventricular complexes are now Present

Technician: FRANCES TAYMIES  
Test Ind:

Referred by:

Confirmed By: MICHAEL MILLER

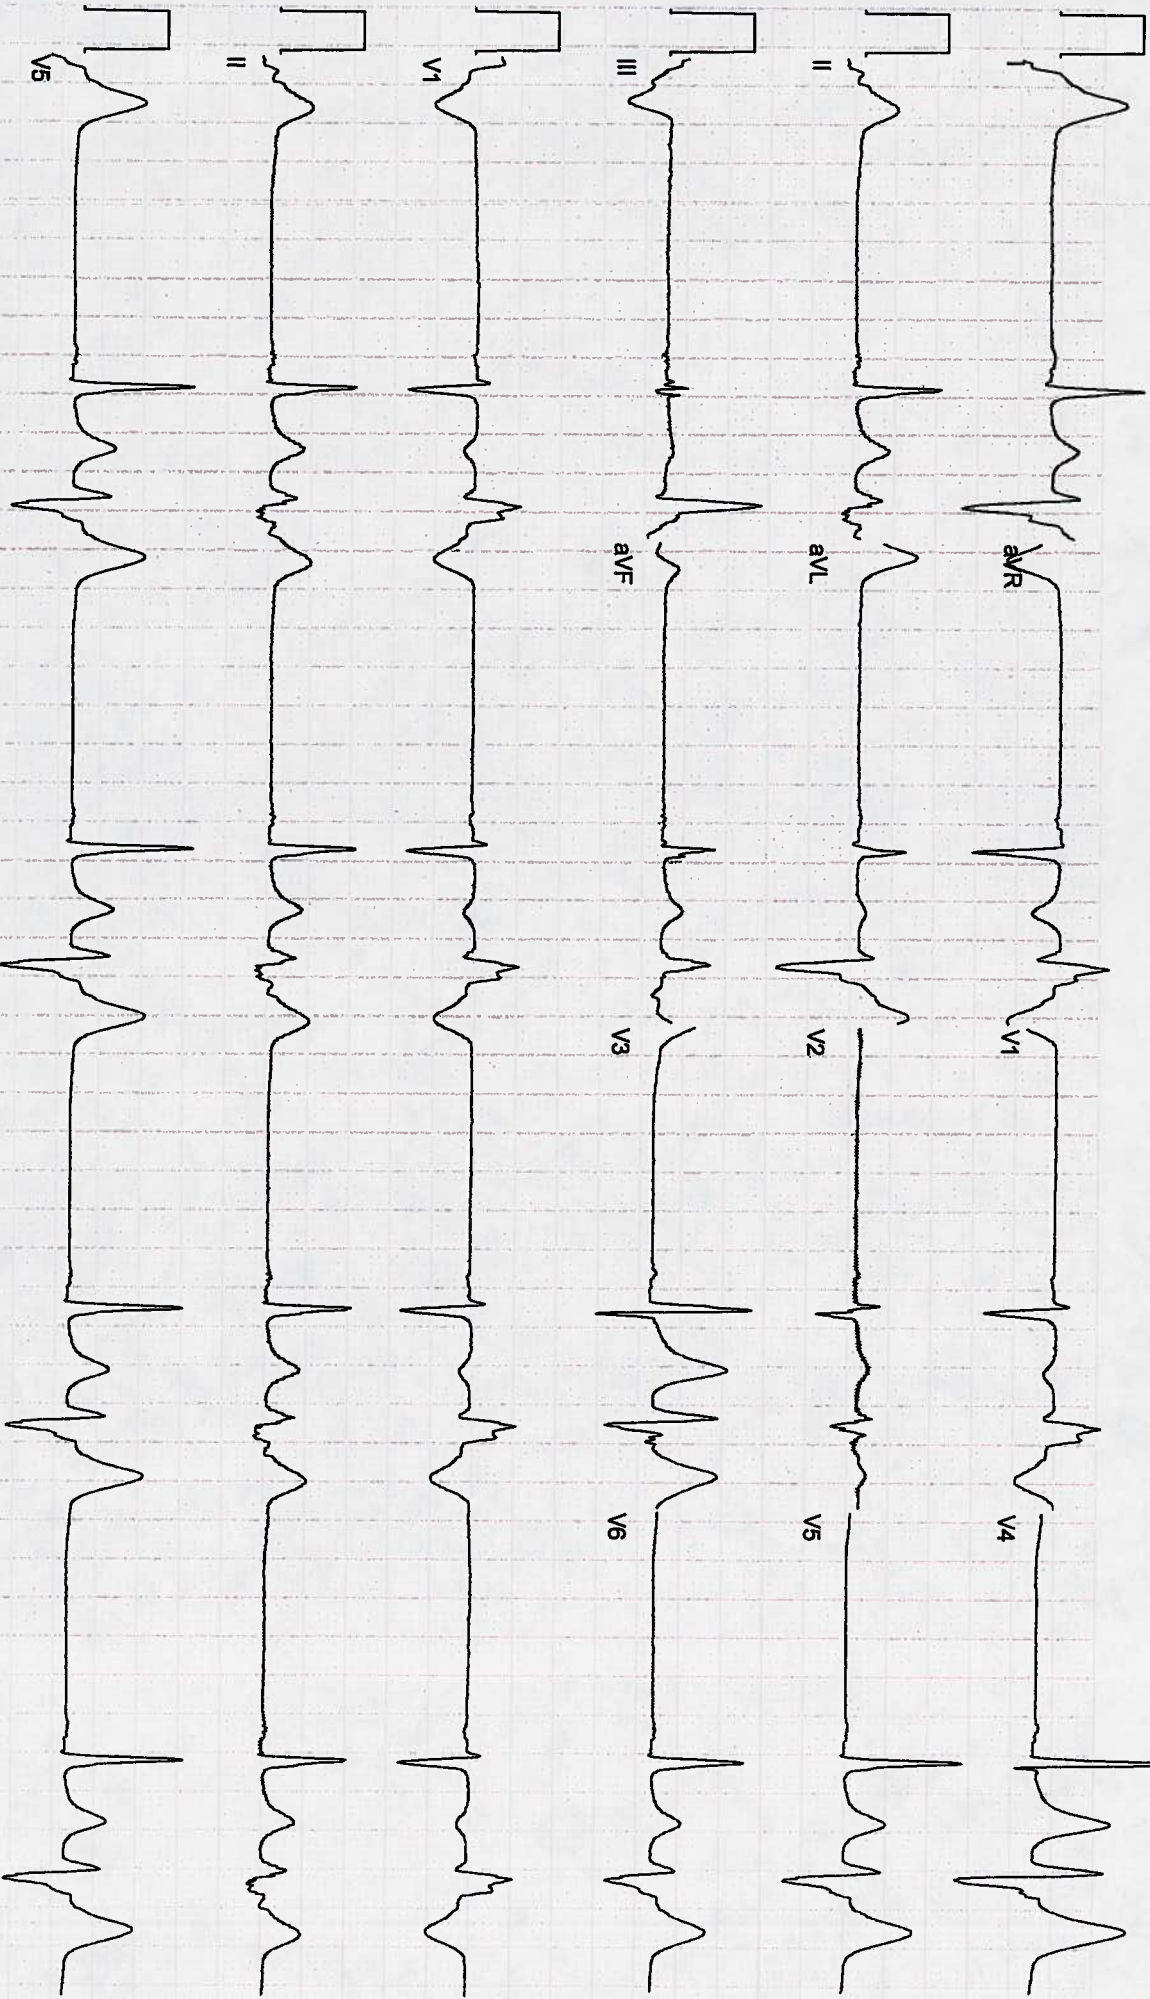

Supplement: f1 [file 9785467.f1.pdf]
